# Supplementary material
Source: Springer Nature journal article supplement (https://www.springermedizin.de/resource/supplementary/13584_2012_57_MOESM3_ESM.pdf/9676970)

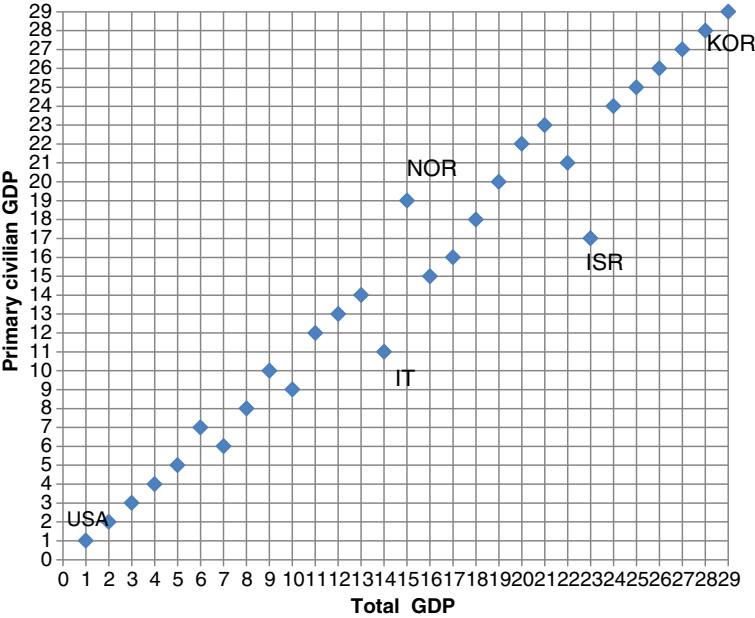

Supplement: MOESM3 [file 9676970]
